# Supplementary material for: Phase segregation in bio-inspired multi-component vesicles encompassing double tail phospholipid species
Source: Royal Society of Chemistry journal article supplement (doi:10.1039/c4sm00998c), 2014-01-01
Supplement: c4sm00998c1.pdf [file c4sm00998c1.pdf]

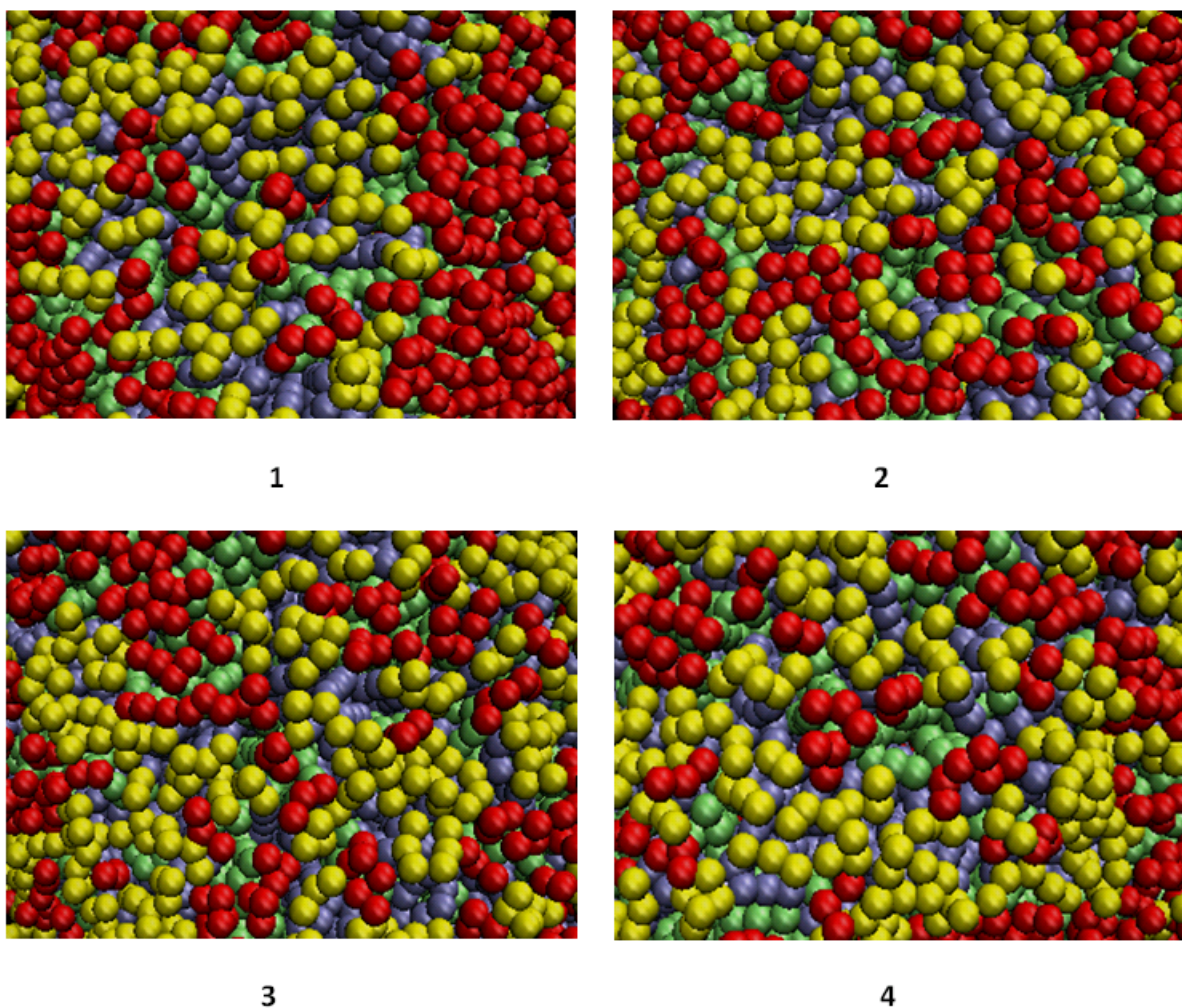

**Figure S11.** The distribution of the head beads in the two-component system as a function of four consecutive time steps. The exact same region of the vesicle is shown in all the snapshots.

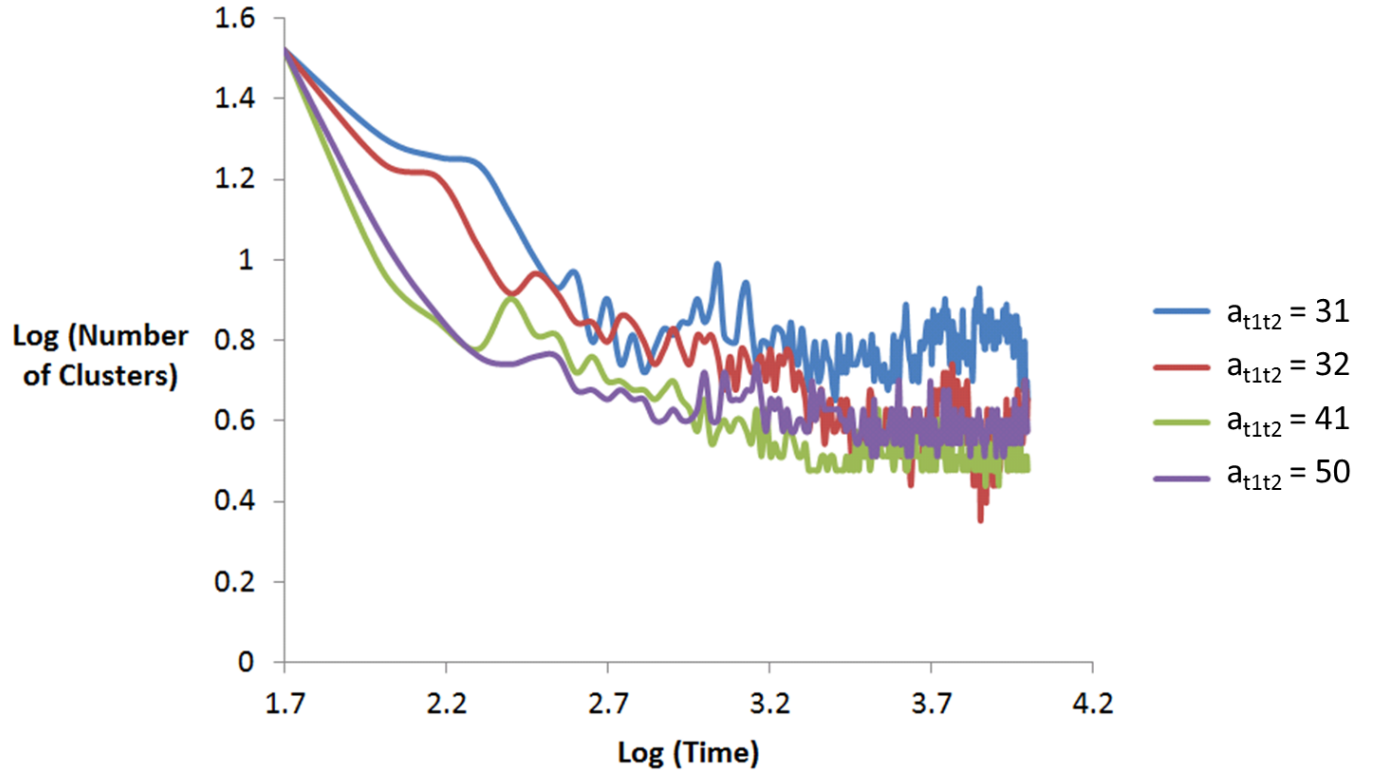

**Figure SI2.** A plot of time scale behavior for the number of clusters used to obtain the scaling exponent ( $\alpha$ ) for the tail-tail soft repulsive interaction parameters of  $a_{t1-t2} = 31, 32, 41$ , and  $50$ . The simulations have been run for a total time of  $10,000\tau$  from the mixed state and each data point has been averaged over four simulation runs using different random seeds.

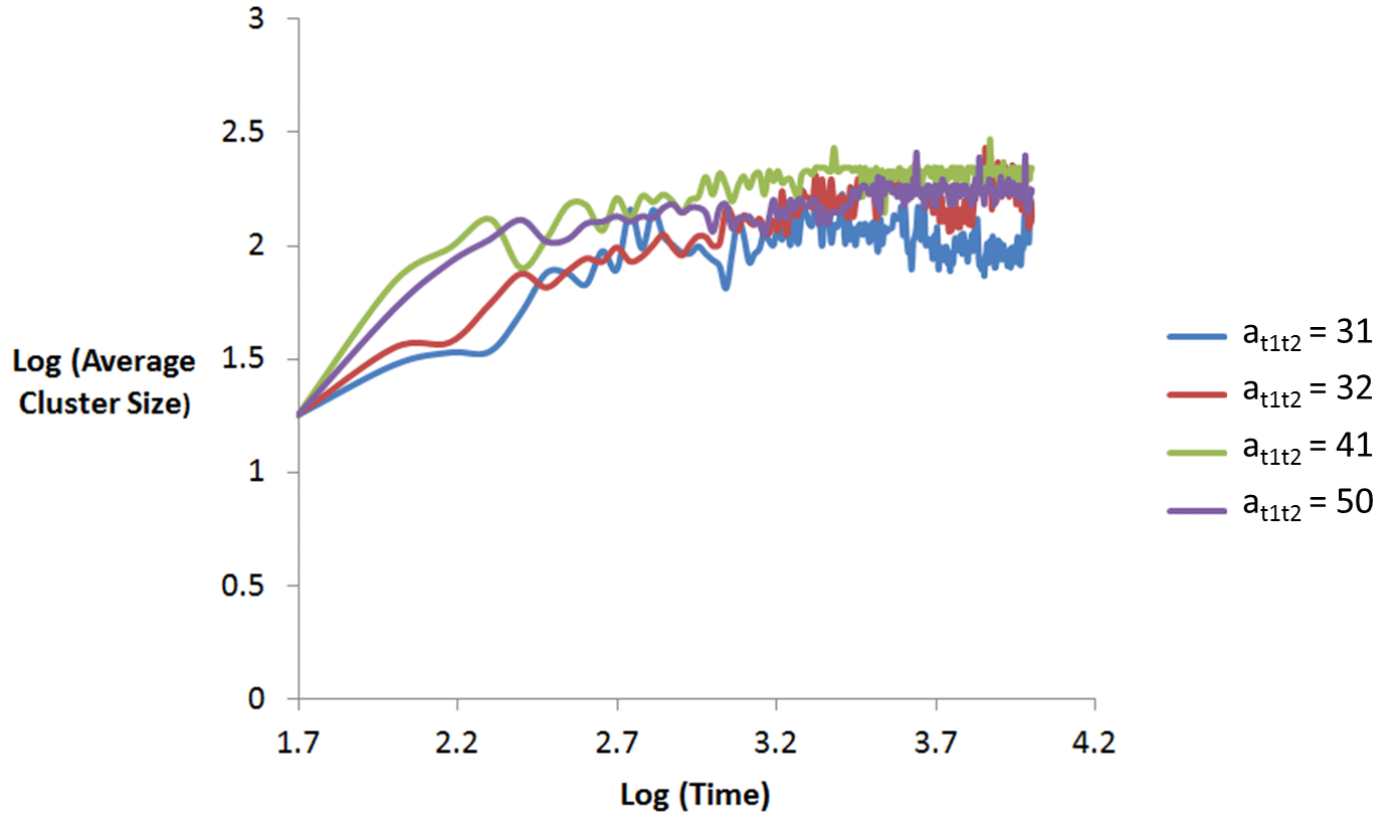

**Figure SI3.** A plot of time scale behavior for the average cluster size used to obtain the scaling exponent ( $\beta$ ) for the tail-tail soft repulsive interaction parameters of  $a_{t1-t2} = 31, 32, 41$ , and  $50$ . The simulations have been run for a total time of  $10,000\tau$  from the mixed state and each data point has been averaged over four simulation runs using different random seeds.
